# Supplementary material
Source: PubMed Central journal article supplement (PMC10537573)
Supplement: aem.01033-23-s0001.pdf [file aem.01033-23-s0001.pdf]

**Table S1. Nitrogenase distribution among genome-sequenced Methanosarcinales.**

| Species                                                 | Mo-nitrogenase<br>( <i>nif</i> ) | V-nitrogenase<br>( <i>vnf</i> ) | Fe-nitrogenase<br>( <i>anf</i> ) |
|---------------------------------------------------------|----------------------------------|---------------------------------|----------------------------------|
| <i>Methanococcoides burtonii</i> NC 007955              |                                  |                                 |                                  |
| <i>Methanococcoides methylutens</i> MM1 NZ CP009518     |                                  |                                 |                                  |
| <i>Methanohalobium evestigatum</i> Z-7303 NC 014253     |                                  |                                 |                                  |
| <i>Methanohalophilus halophilus</i> NZ CP017921         |                                  |                                 |                                  |
| <i>Methanohalophilus mahii</i> NC 014002                |                                  |                                 |                                  |
| <i>Methanolobus psychrophilus</i> R15 NC 018876         | •                                |                                 |                                  |
| <i>Methanolobus zinderi</i> NZ CP058215                 | •                                |                                 |                                  |
| <i>Methanomethylovorans hollandica</i> NC 019977        |                                  |                                 |                                  |
| <i>Methanosaeta harundinacea</i> 6Ac NC 017527          |                                  |                                 |                                  |
| <i>Methanosalsum zhilinae</i> NC 015676                 |                                  |                                 |                                  |
| <i>Methanosarcina acetivorans</i> C2A NC 003552         | •                                | •                               | •                                |
| <i>Methanosarcina barkeri</i> 227 NZ CP009530           | •                                | •                               |                                  |
| <i>Methanosarcina barkeri</i> 3 NZ CP009517             | •                                | •                               | •                                |
| <i>Methanosarcina barkeri</i> CM1 NZ CP008746           | •                                | •                               |                                  |
| <i>Methanosarcina barkeri</i> MS NZ CP009528            | •                                | •                               |                                  |
| <i>Methanosarcina barkeri</i> str. Fusaro NC 007355     | •                                | •                               | — <sup>a</sup>                   |
| <i>Methanosarcina barkeri</i> str. Wiesmoor NZ CP009526 | •                                | •                               | — <sup>a</sup>                   |
| <i>Methanosarcina flavescens</i> NZ CP032683            |                                  |                                 |                                  |
| <i>Methanosarcina horonobensis</i> HB-1 NZ CP009516     | •                                |                                 |                                  |
| <i>Methanosarcina lacustris</i> Z-7289 NZ CP009515      |                                  |                                 |                                  |
| <i>Methanosarcina mazei</i> zm-15 NZ CP042908           | •                                |                                 |                                  |
| <i>Methanosarcina mazei</i> C16 NZ CP009514             | •                                |                                 |                                  |
| <i>Methanosarcina mazei</i> Gö1 NC 003901               | •                                |                                 |                                  |
| <i>Methanosarcina mazei</i> LYC NZ CP009513             | •                                |                                 |                                  |
| <i>Methanosarcina mazei</i> S-6 NZ CP009512             | •                                |                                 |                                  |
| <i>Methanosarcina mazei</i> SarPi NZ CP009511           | •                                |                                 |                                  |
| <i>Methanosarcina mazei</i> Tuc01 NC 020389             | •                                |                                 |                                  |
| <i>Methanosarcina mazei</i> WWM610 NZ CP009505          | •                                |                                 |                                  |
| <i>Methanosarcina siciliae</i> C2J NZ CP009508          | •                                | •                               | •                                |
| <i>Methanosarcina siciliae</i> HI350 NZ CP009507        | •                                | •                               |                                  |
| <i>Methanosarcina siciliae</i> T4/M NZ CP009506         | •                                | •                               | •                                |
| <i>Methanosarcina</i> sp. Kolksee NZ CP009524           | •                                | •                               |                                  |
| <i>Methanosarcina</i> sp. MTP4 NZ CP009505              |                                  |                                 |                                  |
| <i>Methanosarcina</i> sp. WH1 NZ CP009504               | •                                |                                 |                                  |
| <i>Methanosarcina</i> sp. WWM596 NZ CP009503            | •                                |                                 |                                  |
| <i>Methanosarcina thermophila</i> MT-1 NZ CP009501      | — <sup>b</sup>                   |                                 |                                  |
| <i>Methanosarcina thermophila</i> CHTI-55 NZ CP009502   |                                  |                                 |                                  |
| <i>Methanosarcina thermophila</i> TM-1 NZ CP009501      |                                  |                                 |                                  |
| <i>Methanosarcina vacuolata</i> Z-761 NZ CP009520       | •                                | •                               |                                  |
| <i>Methanotherix soehngenii</i> GP6 NC 015416           | •                                |                                 |                                  |
| <i>Methanotherix thermoacetophila</i> PT NC 008553      |                                  |                                 |                                  |

<sup>a</sup>AnfH is truncated and likely non-functional.

<sup>b</sup>Nif-like genes present but not in an operon.

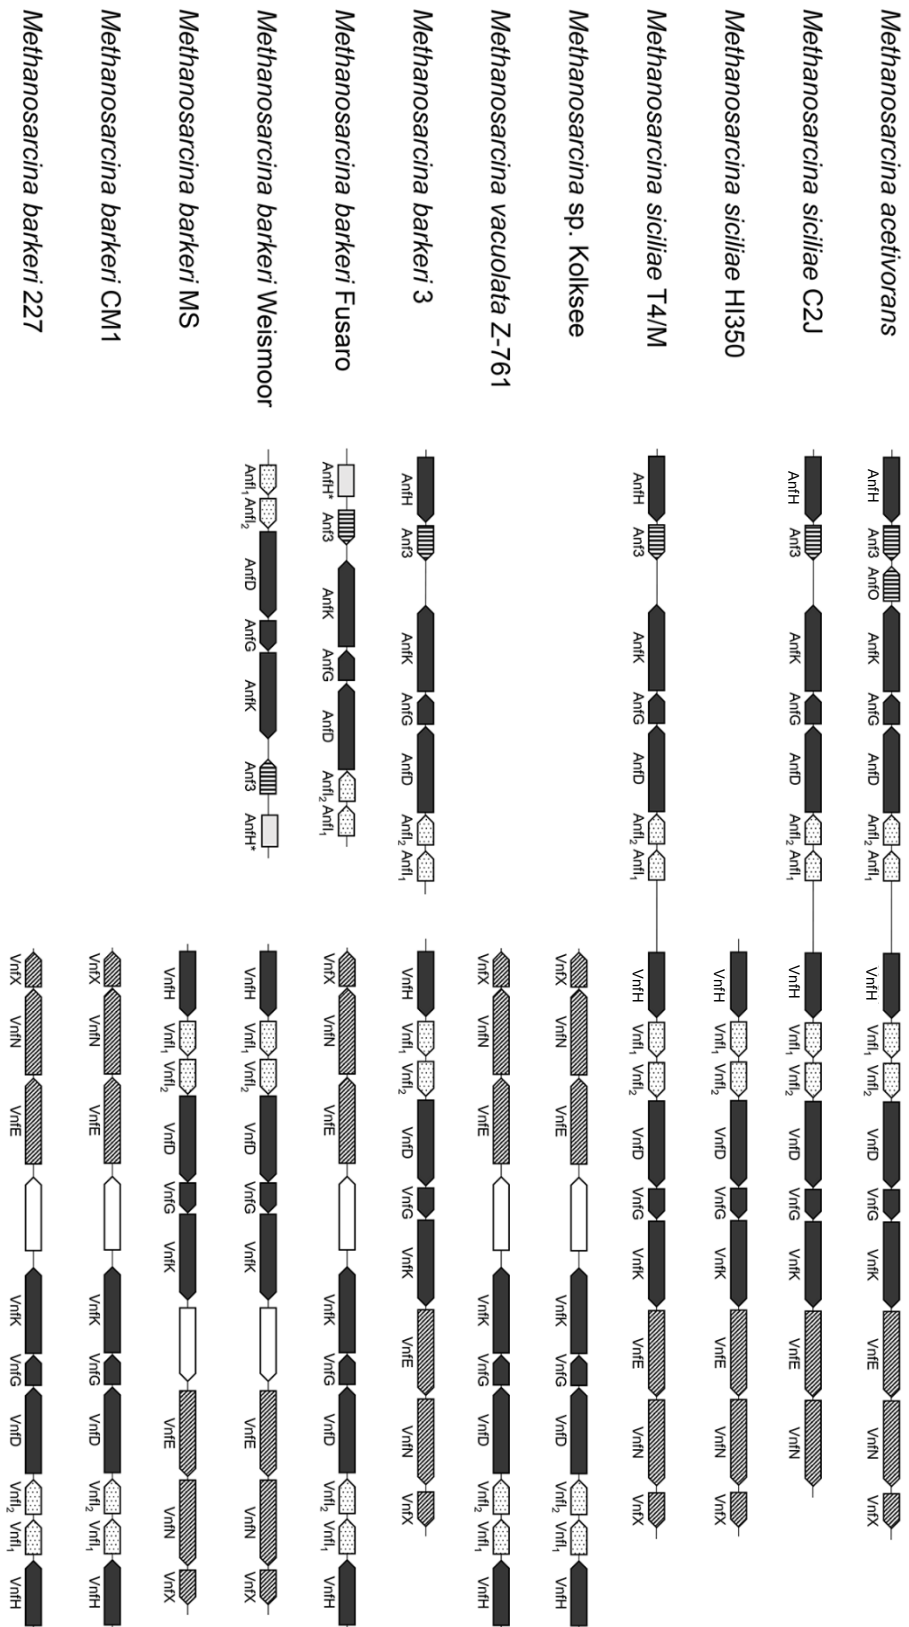

**Fig. S1. Arrangement of the *vnf* and *anf* gene clusters in *Methanosarcinales* species that contain both alternative nitrogenases.**

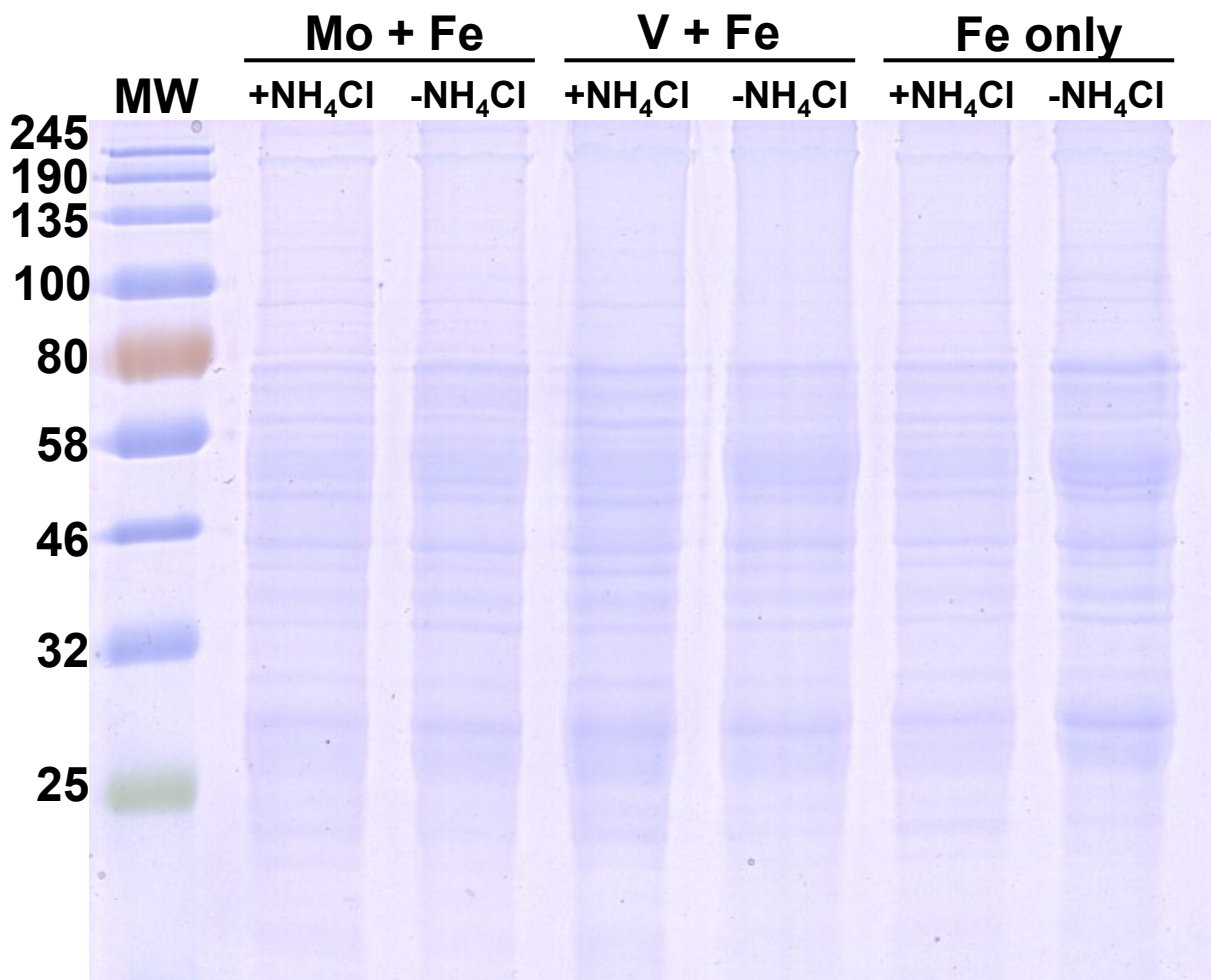

Fig. S2. SDS-PAGE of cell lysates used for Western blot in Fig. 5. MW, molecular weight standard



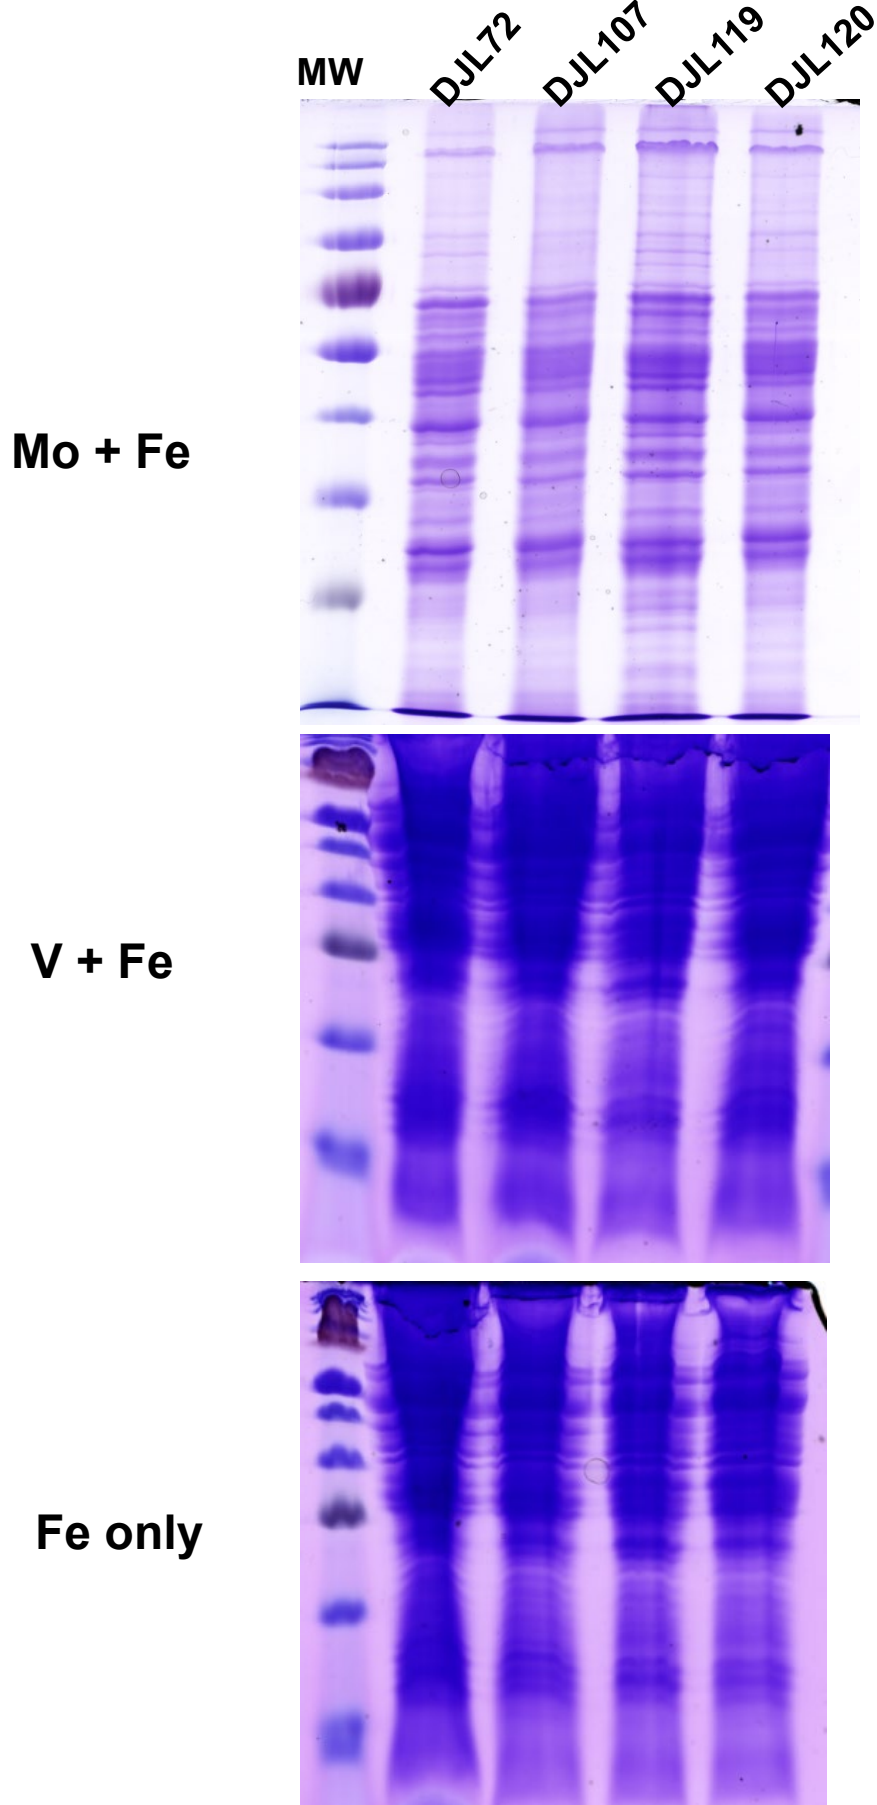

**Fig. S4.** Loading control SDS-PAGE of cell lysates used for Western blot in Fig. 7. MW, molecular weight standard

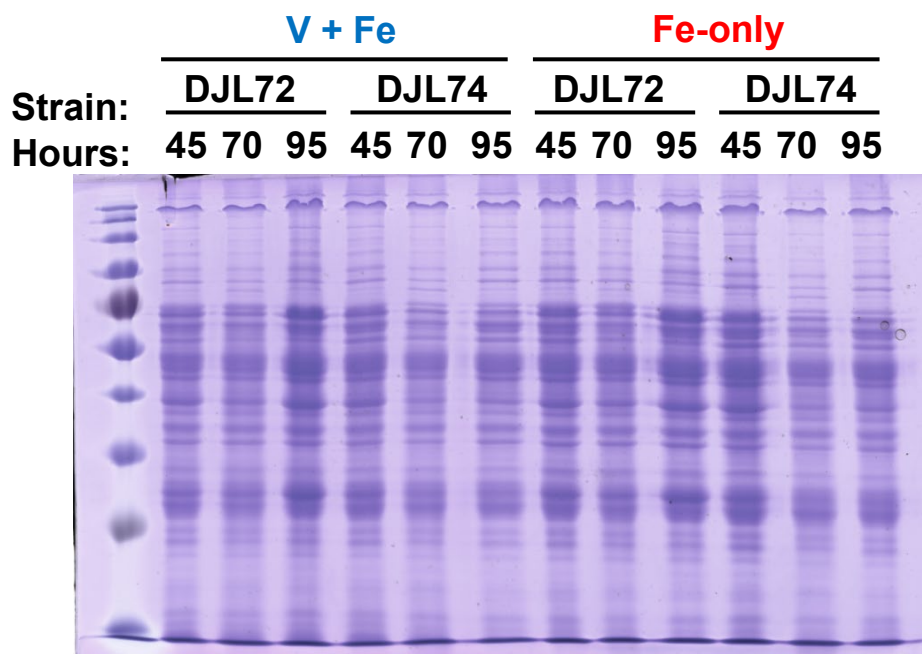

**Fig. S5. Loading control** SDS-PAGE of cell lysates used for western blot in Fig. 6E. MW, molecular weight standard
